# Supplementary material for: Minimal clinically important improvement (MCII) and patient-acceptable symptom state (PASS) in total hip arthroplasty (THA) patients 1 year postoperatively: A prospective cohort study of 1,335 patients
Source: PubMed Central journal article supplement — Acta Orthop. 2014 Feb 25;85(1):39–48. doi: 10.3109/17453674.2013.867782 (PMC3940990; doi:10.3109/17453674.2013.867782), 2014-02-25
Supplement: ORT-85-39-s6152.pdf [file ORT-85-39-s6152.pdf]

**Supplementary article data****Minimal clinically important improvement (MCI) and patient-acceptable symptom state (PASS) in total hip arthroplasty (THA) patients 1 year postoperatively****A prospective cohort study of 1,335 patients**Aksel Paulsen<sup>1</sup>, Ewa M Roos<sup>2</sup>, Alma B Pedersen<sup>3</sup>, and Søren Overgaard<sup>1</sup><sup>1</sup>Department of Orthopaedic Surgery and Traumatology, Odense University Hospital, Institute of Clinical Research, University of Southern Denmark;<sup>2</sup>Research Unit for Musculoskeletal Function and Physiotherapy, Department of Sports Science and Clinical Biomechanics, University of Southern Denmark, Odense; <sup>3</sup>Department of Clinical Epidemiology, Aarhus University Hospital, Aarhus, Denmark.

Correspondence: akselpaulsen@gmail.com

Submitted 13-01-08. Accepted 13-09-24

Table 5. PRO scores for the total population; mean (95% CI)

| PRO         | Preoperative score | Postoperative score | Change score     |
|-------------|--------------------|---------------------|------------------|
| HOOS Pain   | 44 (43–45)         | 89 (88–90)          | 44 (43–46)       |
| HOOS-PS     | 42 (41–43)         | 85 (84–86)          | 43 (42–44)       |
| HOOS QoL    | 31 (30–32)         | 80 (78–81)          | 48 (47–50)       |
| EQ-5D Index | 0.60 (0.59–0.61)   | 0.88 (0.87–0.89)    | 0.27 (0.26–0.28) |
| EQ-VAS      | 62 (60–63)         | 80 (79–81)          | 18 (17–19)       |

Table 6. PRO change scores (mean (95% CI)) and distribution of different answer categories for the hip-specific anchor question; "Overall, how are the problems now in the hip on which you had surgery, compared to before your operation?"

| Anchor          | n (%)      | Δ HOOS Pain | Δ HOOS-PS    | Δ HOOS QoL    | Δ EQ-5D Index <sup>a</sup> | Δ EQ-VAS <sup>a</sup> |
|-----------------|------------|-------------|--------------|---------------|----------------------------|-----------------------|
| Much better     | 1,074 (88) | 48 (47–49)  | 46 (45–48)   | 53 (52–55)    | 0.29 (0.28–0.31)           | 20 (19–22)            |
| A little better | 77         | 24 (20–28)  | 23 (19–28)   | 17 (12–21)    | 0.14 (0.10–0.18)           | 7 (1–12)              |
| About the same  | 35         | 15 (8–21)   | 12 (4–19)    | 12 (6–18)     | 0.09 (0–0.17)              | 0 (–7–7)              |
| A little worse  | 17         | 7 (–3–16)   | 7 (–6 to 20) | –4 (–13 to 5) | 0.04 (–0.07 to 0.15)       | –9 (–19 to 2)         |
| Much worse      | 15         | 6 (–6–17)   | –5 (–15–6)   | 0 (–8 to 7)   | –0.05 (–0.23 to 0.12)      | –7 (–25 to 10)        |

Higher change scores correspond to greater improvement in PRO scores; negative change scores correspond to deterioration in PRO scores.

<sup>a</sup> Anchor–PRO correlation < 0.30.

Table 7. PRO change scores (mean (95% CI)), and distribution of preoperative answers compared to postoperative answers, for the general-health anchor question: “In general, would you say your health is...”

| Anchor          | n (%)    | Δ EQ-5D Index <sup>a</sup> | Δ EQ-VAS       |
|-----------------|----------|----------------------------|----------------|
| > 1 step better | 129 (11) | 0.39 (0.35–0.43)           | 35 (32–39)     |
| 1 step better   | 411 (34) | 0.31 (0.29–0.34)           | 23 (21–25)     |
| No change       | 495 (41) | 0.24 (0.22–0.25)           | 14 (12–16)     |
| 1 step worse    | 151 (13) | 0.18 (0.14–0.22)           | 7 (3–11)       |
| > 1 step worse  | 17       | 0.18 (0.03–0.32)           | -3 (-18 to 12) |

Higher change scores correspond to more improvement in PRO scores; negative change scores correspond to deterioration in PRO scores.

<sup>a</sup> Anchor-PRO correlation < 0.30.

Table 8. Spearman’s correlation coefficients: PROs and anchor questions

| PRO         | MCII                |                       | PASS                |                       |
|-------------|---------------------|-----------------------|---------------------|-----------------------|
|             | Hip-specific anchor | General-health anchor | Hip-specific anchor | General-health anchor |
| HOOS Pain   | -0.40               | 0.25 <sup>a</sup>     | -0.59               | -0.45 <sup>a</sup>    |
| HOOS-PS     | -0.40               | 0.28 <sup>a</sup>     | -0.53               | -0.46 <sup>a</sup>    |
| HOOS QoL    | -0.46               | 0.28 <sup>a</sup>     | -0.61               | -0.41 <sup>a</sup>    |
| EQ-5D Index | -0.27               | 0.27                  | -0.60               | -0.53                 |
| EQ-VAS      | -0.25               | 0.35                  | -0.48               | -0.68                 |

<sup>a</sup> Correlation not reported in the article since hip-specific PROs cannot be used to assess general health, and MCII and PASS in relation to the general-health anchor questions were only estimated for the EQ-5D Index and EQ-VAS.

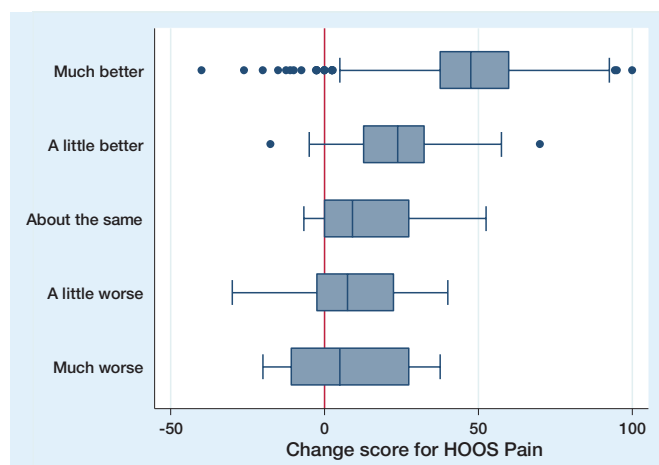

Figure 3. Box plot of HOOS Pain change scores of different answer categories for the hip-specific anchor question: “Overall, how are the problems now in the hip on which you had surgery, compared to before your operation?” The box plot shows outliers, sample minimum, lower quartile, median, upper quartile and sample maximum.

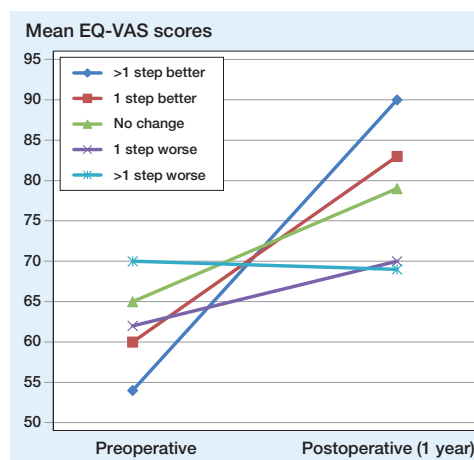

Figure 4. Mean preoperative and postoperative EQ-VAS scores of preoperative answers compared to postoperative answers, for the general-health anchor question: “In general, would you say your health is...”

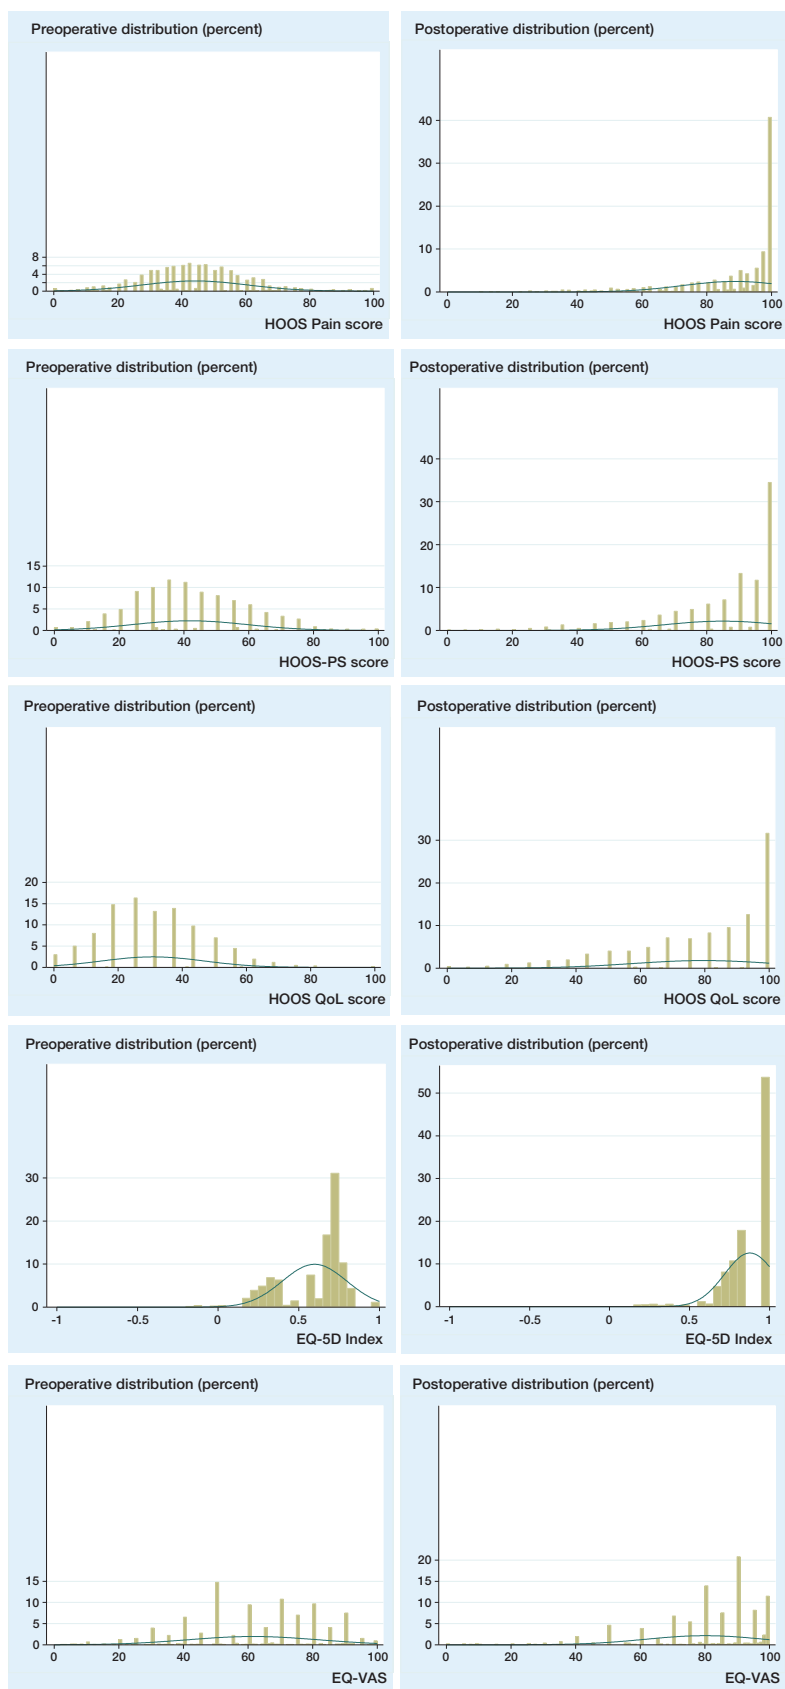

Figure 2. Distribution of preoperative and postoperative PRO scores.
